# Supplementary material
Source: MDPI journal article supplement (https://www.mdpi.com/2073-4344/12/7/781)
Supplement: s1 [file s1 › catalysts-1797424-supplementary.pdf]

# A novel NADP(H)-dependent 7 $\alpha$ -HSDH: discovery and construction of substrate selectivity mutant by C-terminal truncation

Yinping Pan<sup>1,†</sup>, Shijin Tang<sup>1,†</sup>, Minghai Zhou<sup>1</sup>, Fanglin Ao<sup>1</sup>, Zhuozhou Tang<sup>1</sup>, Liancai Zhu<sup>1,2\*</sup>, Deshuai Lou<sup>3</sup>, Jun Tan<sup>3</sup>, Bochu Wang<sup>1\*</sup>

<sup>1</sup>Key Laboratory of Biorheological Science and Technology, Ministry of Education, College of Bioengineering, Chongqing University, Chongqing 400030, PR China, 201819021098@cqu.edu.cn (Y.P.), 20161902090@cqu.edu.cn (S.T.), minghaizhou@cqu.edu.cn (M.Z.), 20185603@cqu.edu.cn (F.A.), 20185647@cqu.edu.cn (Z.T.)

<sup>2</sup>Modern Life Science Experiment Teaching Center, College of Bioengineering, Chongqing University, Chongqing 400030, PR China,

<sup>3</sup>Chongqing Key Laboratory of Medicinal Resources in the Three Gorges Reservoir Region, School of Biological & Chemical engineering, Chongqing University of Education, Chongqing 400067, PR China, louds@cque.edu.cn (D.L.), tanjun@cque.edu.cn (J.T.)

<sup>†</sup>These authors contributed equally to this work.

\* Correspondence: author. College of Bioengineering, Chongqing University, Chongqing, 400030, China. E-mail addresses: wangbc@cqu.edu.cn (B.W.), zhuliancai@cqu.edu.cn (L.Z.)

**Abstract:** 7 $\alpha$ -Hydroxysteroid dehydrogenase (7 $\alpha$ -HSDH) plays an important role in the biosynthesis of tauroursodeoxycholic acid (TUDCA) using complex substrate chicken bile powder as raw material. However, chicken bile powder contains 4.74% taurocholic acid (TCA), and a new by-product tauroursocholic acid (TUCA) will be produced, having the risk of causing colorectal cancer. Here, we obtained a novel NADP(H)-dependent 7 $\alpha$ -HSDH with good thermostability from *Ursus thibetanus* gut microbiota (named St-2-2). St-2-2 could catalyze taurochenodeoxycholic acid (TCDCA) and TCA with the catalytic activity of 128.13 and 269.39 U/mg, respectively. Interestingly, by a structure-based C-terminal truncation strategy, St-2-2 $\Delta$ C10 only remained catalytic activity on TCDCA (14.19 U/mg) and had no activity on TCA. As a result, it can selectively catalyze TCDCA in waste chicken bile powder. MD simulation and structural analysis indicated that enhanced surface hydrophilicity and improved C-terminal rigidity affected the entry and exit of substrates. Hydrogen bond interactions between different subunits and interaction changes in Phe249 of the C-terminal loop inverted the substrate catalytic activity. This is the first report on substrate selectivity of 7 $\alpha$ -HSDH by C-terminal truncation strategy and it can be extended to other 7 $\alpha$ -HSDHs (J-1-1, S1-a-1).

**Keywords:** 7 $\alpha$ -hydroxysteroid dehydrogenase (7 $\alpha$ -HSDH; St-2-2); St-2-2 $\Delta$ C10; C-terminal truncation; substrate selectivity; tauroursodeoxycholic acid

**Citation:** A novel NADP(H)-dependent 7 $\alpha$ -HSDH: discovery and construction of substrate selectivity mutant by C-terminal truncation. *Catalysts* **2022**, *12*, 781. <https://doi.org/10.3390/catal12070781>

Received: 16 June 2022

Accepted: 11 July 2022

Published: 14 July 2022

**Publisher's Note:** MDPI stays neutral with regard to jurisdictional claims in published maps and institutional affiliations.

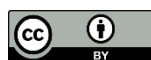

**Copyright:** © 2022 by the authors. Licensee MDPI, Basel, Switzerland. This article is an open access article distributed under the terms and conditions of the Creative Commons Attribution (CC BY) license (<http://creativecommons.org/licenses/by/4.0/>).

**Table S1.** Primers used for mutagenesis.

| Primer        | Sequence (5'-3')                   |
|---------------|------------------------------------|
| St-2-2△C2-RP  | CGCTCGAGTTAAACAGCATCCCCATAAATAGGT  |
| St-2-2△C4-RP  | CGCTCGAGTTAATCCCCATAAATAGGTGA      |
| St-2-2△C6-RP  | CGCTCGAGTTAATAAATAGGTGATGGCATAACCA |
| St-2-2△C8-RP  | CGCTCGAGTTAAGGTGATGGCATAACCAAAT    |
| St-2-2△C10-RP | CGCTCGAGTTATGGCATAACCAAATCCACCT    |
| St-2-2△*-FP   | CGCGGATCCATGAAAAAGAGTAGAAAATAAAG   |
| J-1-1△C1-RP   | CGCTCGAGTTATTGAACAAGGTCTCCGTATTG   |
| J-1-1△C4-RP   | CGCTCGAGTTAGTCTCCGTATTGAGGTGTTCCA  |
| J-1-1△C6-RP   | CGCTCGAGTTAGTATTGAGGTGTTCCAAGGGCA  |
| J-1-1△C8-RP   | CGCTCGAGTTAAGGTGTTCCAAGGGCATATCCA  |
| J-1-1△**-FP   | CGCGGATCCATGAGAGTAAAAGATAAAATAGCTT |
| S1-a-1△C2-RP  | CGCTCGAGCTATCTCTCCATCATTGCAGAAAAAC |
| S1-a-1△C4-RP  | CGCTCGAGCTACATCATTGCAGAAAACTCA     |
| S1-a-1△C6-RP  | CGCTCGAGCTATGCAGAAAACTCAGCATAT     |
| S1-a-1△C8-RP  | CGCTCGAGCTAAAACTCAGCATATTGTGGA     |
| S1-a-1△***-FP | CGCGGATCCATGAAAAAGTTAGAAGATAAAGT   |

\* The FP of all St-2-2 mutants are the same. \*\*The FP of all J-1-1 mutants are the same. \*\*\*The FP of all S1-a-1 mutants are the same.

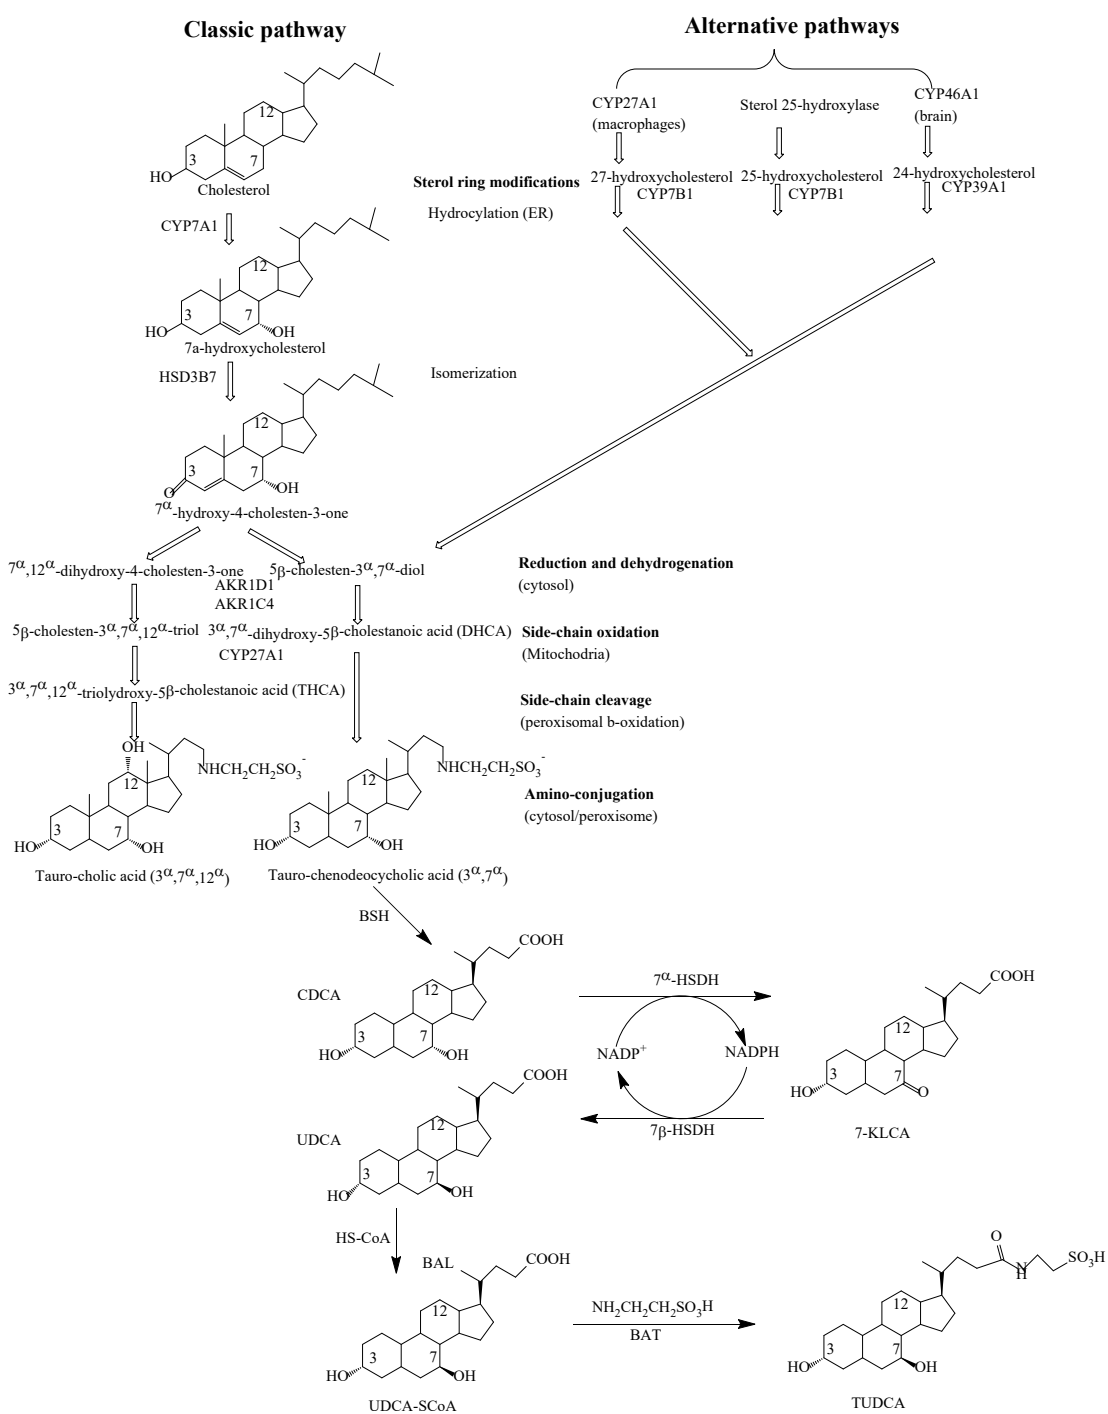

**Figure S1.** The metabolic pathway of TUDCA *in vivo*[1].

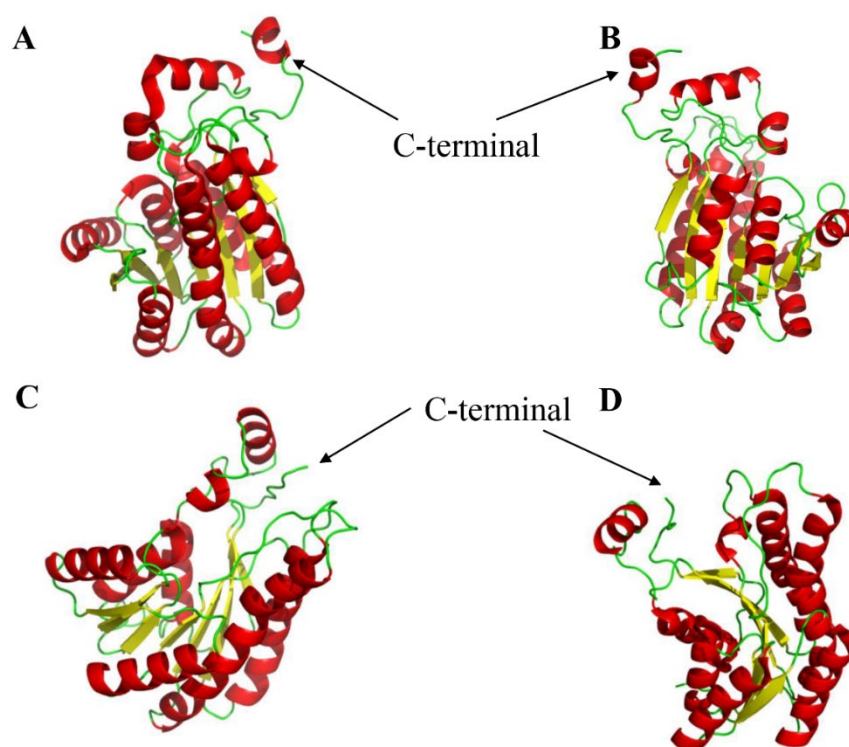

**Figure S2.** Structural comparison of 7 $\alpha$ -HSDHs. The structure of 7 $\alpha$ -HSDHs from *Clostridium sardiniense* (PDB code: 5EPO), St-2-2, *Escherichia coli* (PDB code: 1FMC) and *Brucella Melitensis* (PDB code: 3GAF).

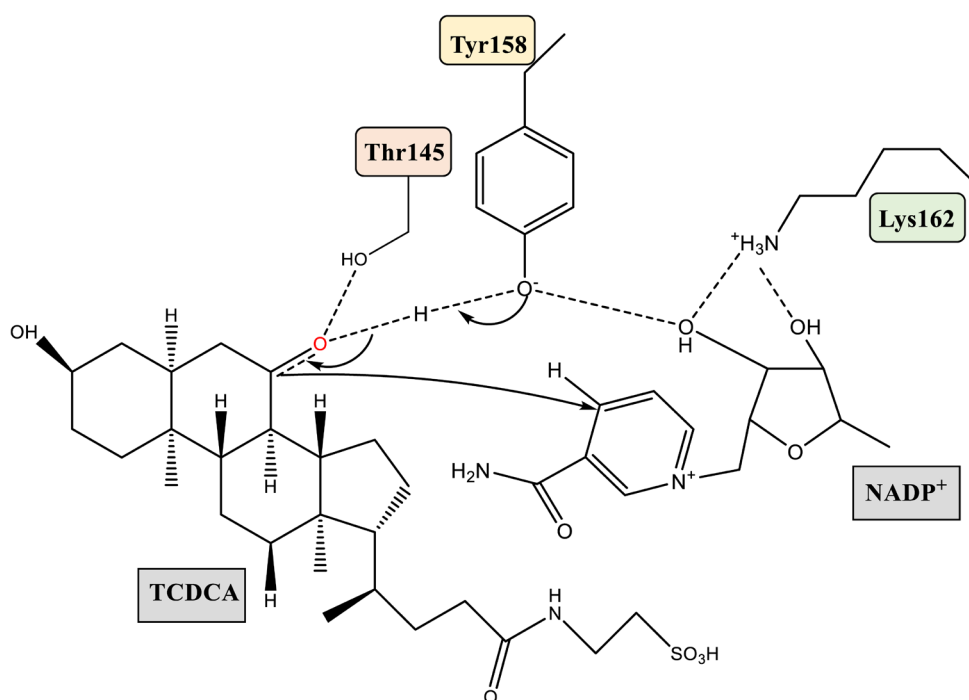

**Figure S3.** Reaction mechanism for the reduction of TCDCA to T-7-KLCA by 7 $\alpha$ -HSDH and the role of T-Y-K residues at the catalytic center. Black arrows show hypothesized proton transfer during the reaction. Picture modified on the base of a scheme at Tanaka et al.[2].

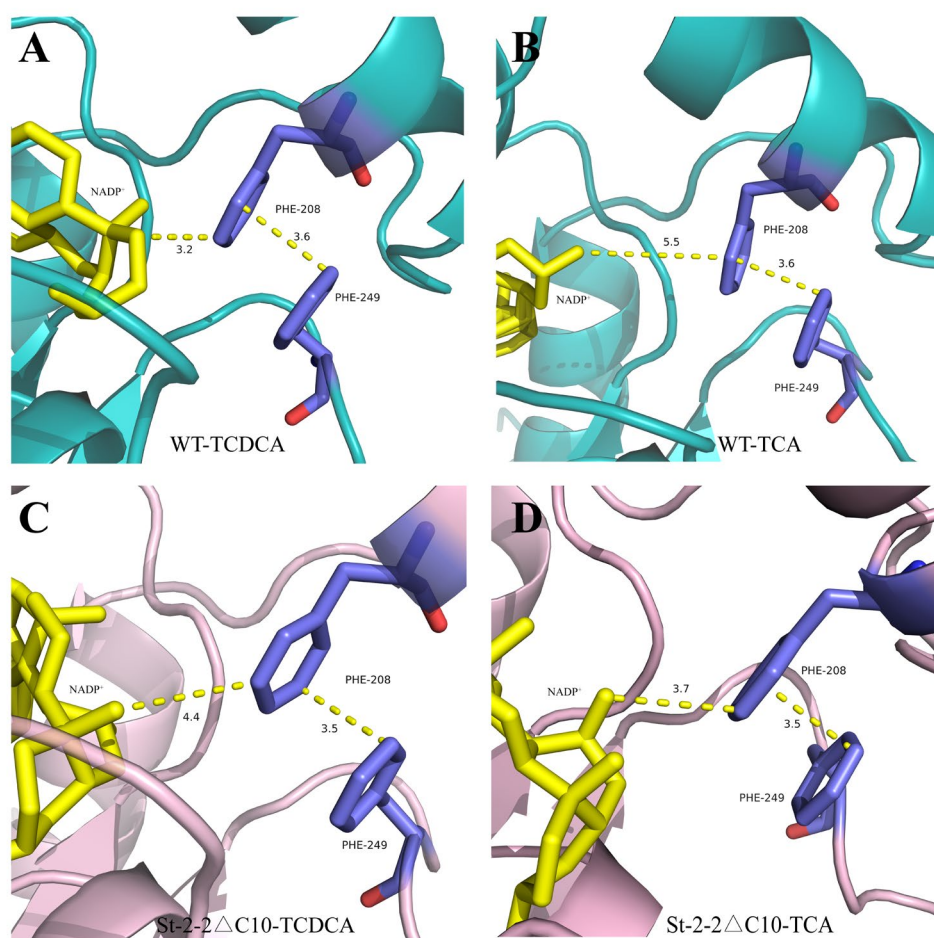

**Figure S4.** Interaction analysis of substrate and amino acid residues at C-terminal. (A) WT-TCDCA-NADP<sup>+</sup>, (B) WT-TCA-NADP<sup>+</sup> (C) St-2-2ΔC10-TCDCA-NADP<sup>+</sup>, (D) St-2-2ΔC10-TCA-NADP<sup>+</sup>. NADP<sup>+</sup> is colored in yellow stick. WT and St-2-2ΔC10 are colored in cyan and pink, respectively. The yellow dotted line indicates the distance between the substrate and neighbor amino acid residues. Amino acids are shown as stick models.

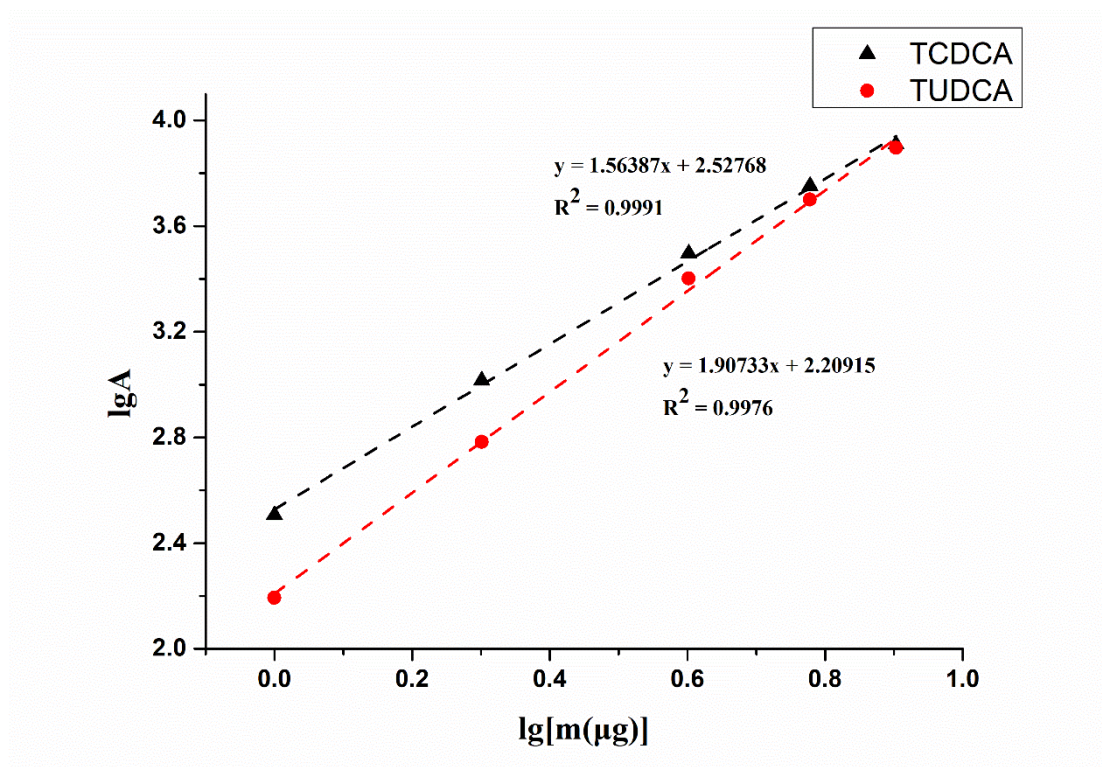

Figure S5. HPLC calibration diagram.

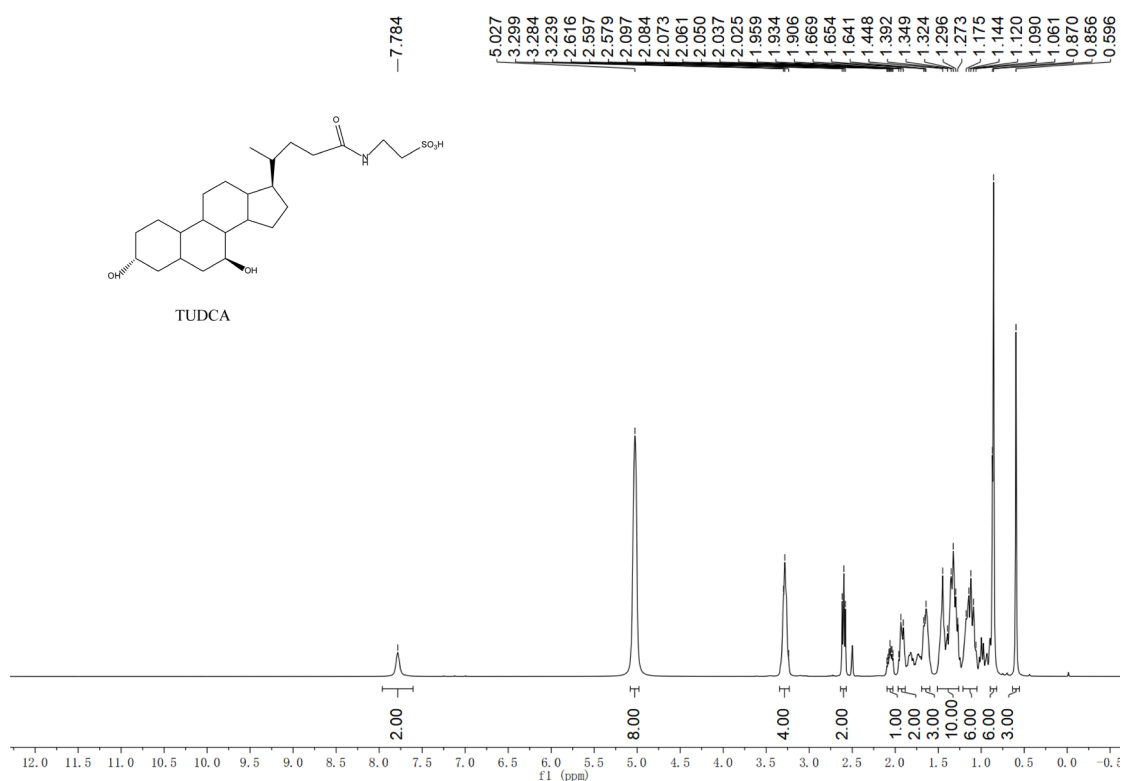Figure S6.  $^1\text{H}$  NMR of TUDCA prepared by enzymatic cascade reaction.

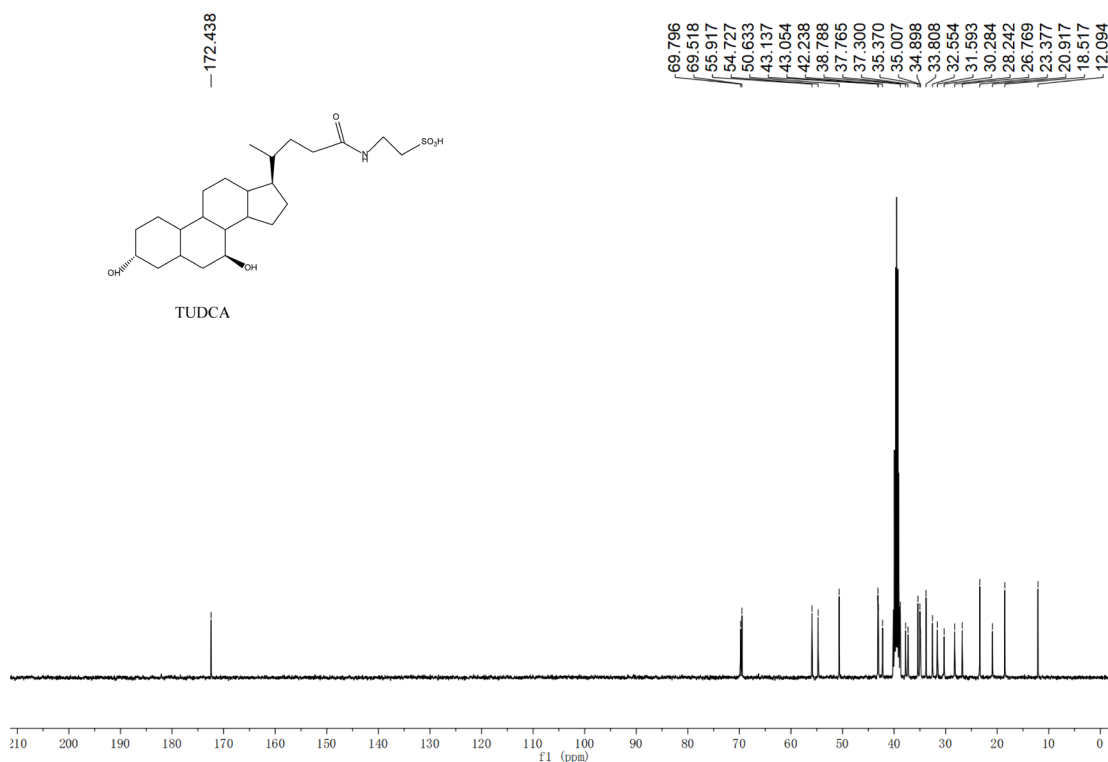

**Figure S7.** <sup>13</sup>C NMR of TUDCA prepared by enzymatic cascade reaction.

## References

1. Chiang, J.Y.L. Bile acid metabolism and signaling in liver disease and therapy. *Liver research*. 2017, 1, 3-9.
2. Tanaka, N.; Nonaka, T.; Tanabe, T.; Yoshimoto, T.; Tsuru, D.; Mitsui, Y. Crystal structures of the binary and ternary complexes of 7 alpha-hydroxysteroid dehydrogenase from *Escherichia coli*. *Biochemistry*. 1996, 35, 7715-7730.
